# 1 **Development and validation of a real-time RT-PCR test for screening pepper and tomato** 2 **seed lots for the presence of pospiviroids**

3 Marleen Botermans<sup>1\*</sup>, Johanna W. Roenhorst<sup>1</sup>, Marinus Hooftman<sup>4</sup>, Jacobus Th.J. Verhoeven<sup>1</sup>,  
4 Eveline Metz<sup>1</sup>, Esther J. van Veen<sup>1</sup>, Bart P.J. Geraats<sup>2</sup>, Mark Kemper<sup>2</sup>, Debora C.M. Beugelsdijk<sup>3</sup>,  
5 Harrie Koenraad<sup>4</sup>, Agata Jodlowska<sup>4</sup>, Marcel Westenberg<sup>1</sup>

6  
7 <sup>1</sup> National Plant Protection Organization, Wageningen, The Netherlands

8 <sup>2</sup> BASF Vegetable Seeds, Nunhem, The Netherlands

9 <sup>3</sup> Enza Zaden Seed Operations BV, Enkhuizen, The Netherlands

10 <sup>4</sup> Naktuinbouw, Roelofarendsveen, The Netherlands

11  
12 \*Corresponding author

13 E-mail: [m.botermans@nvwa.nl](mailto:m.botermans@nvwa.nl) (MB)

## 14 15 **Abstract**

16 Potato spindle tuber viroid and other pospiviroids can cause serious diseases in potato and tomato  
17 crops. Consequently, pospiviroids are regulated in several countries. Since seed transmission is  
18 considered as a pathway for the introduction and spread of pospiviroids, some countries demand  
19 for the testing of seed lots of solanaceous crops for the presence of pospiviroids. A real-time RT-  
20 PCR test, named PospSense, was developed for testing pepper (*Capsicum annuum*) and tomato  
21 (*Solanum lycopersicum*) seeds for seven pospiviroid species known to occur naturally in these  
22 crops. The test consists of two multiplex reactions running in parallel, PospSense 1 and  
23 PospSense 2, that target Citrus exocortis viroid (CEVd), Columnea latent viroid (CLVd), pepper  
24 chat fruit viroid (PCFVd), potato spindle tuber viroid (PSTVd), tomato apical stunt viroid (TASVd),  
25 tomato chlorotic dwarf viroid (TCDVd) and tomato planta macho viroid (TPMVd, including the  
26 former Mexican papita viroid). Dahlia latent viroid (DLVd) is used as an internal isolation control.  
27 Validation of the test showed that for both pepper and tomato seeds the current requirements of a  
28 routine screening test are fulfilled, i.e. the ability to detect one infested seed in a sample of c.1000

29 seeds for each of these seven pospiviroids. Additionally, the Pospisense test performed well in an  
30 inter-laboratory comparison, which included two routine seed-testing laboratories, and as such  
31 provides a relatively easy alternative to the currently used tests.

32

## 33 **Introduction**

34 Pospiviroids are single-stranded circular RNA molecules consisting of around 360 nucleotides. The  
35 genus *Pospiviroid* is in the family *Pospiviroidae*, with *Potato spindle tuber viroid* (PSTVd) being the  
36 type species. Most pospiviroids can infect a wide range of plant species, including many  
37 solanaceous ornamental and vegetable crops. Infected plants often remain symptomless, although  
38 PSTVd and some other pospiviroids may cause serious diseases in potato and tomato crops (1, 2).  
39 For this reason, many countries have implemented phytosanitary measures to prevent their  
40 introduction and spread.

41 Pospiviroids may spread by vegetative propagation, mechanical transmission, and to a lesser  
42 extent also by insects, pollen and seeds (3, 4).

43 The importance of seeds as a pathway for introduction and spread of pospiviroids in solanaceous  
44 fruit crops is still a matter of debate. This is due to the fact that both successful- and failed  
45 transmission from infested seeds to seedlings has been reported (5-8). Nevertheless, some  
46 countries require mandatory testing of pepper (*Capsicum annuum*) and tomato (*Solanum*  
47 *lycopersicum*) seed lots before import. Consequently, there is a need for reliable and cost-effective  
48 tests for screening pepper and tomato seed lots for PSTVd and other pospiviroids identified in  
49 these crops, i.e. Citrus exocortis viroid (CEVd), Columnea latent viroid (CLVd), pepper chat fruit  
50 viroid (PCFVd), tomato apical stunt viroid (TASVd), tomato chlorotic dwarf viroid (TCDVd) and  
51 tomato planta macho viroid (TPMVd, including the former Mexican papita viroid).

52 For detection of pospiviroids, several molecular tests are already available but they have their  
53 limitations regarding analytical specificity and sensitivity. The generic tests described by  
54 Botermans et al. (9), van Brunschot et al. (10), and Monger et al. (11) were designed and  
55 validated for generic pospiviroid detection in leaf material, but are not sensitive enough for testing  
56 seed lots in which pospiviroid concentrations are generally lower. Other tests, such as the test

57 described by Boonham et al. (12), are sensitive enough, but can only detect a limited number of  
58 species. Naktuinbouw (12-15) designed and validated a generic seed test, which is currently  
59 recommended by the International Seed Federation (16). This test consists of four parallel  
60 reactions that allow detection of one infested seed in a sample of c.1000 seeds for each of the  
61 seven pospiviroid species. A new test, therefore, should perform equally well and preferably  
62 reduces the number of reactions.

63 This paper describes the development and validation of a real-time RT-PCR test (PospSense) for  
64 routine detection of the seven pospiviroid species in seeds of pepper and tomato. The test consists  
65 of two multiplex reactions running in parallel with a single internal isolation control, and provides an  
66 alternative to the currently used tests.

67

## 68 **Materials and methods**

### 69 **Isolates used and confirmation of identity**

70 Pospiviroid isolates and other pathogens used for test development and validation are presented in  
71 Table 1. The identity of the majority of pospiviroid species was confirmed by sequence analysis of  
72 the amplicons obtained by conventional RT-PCRs using different primer sets: Posp1-FW/Posp1-  
73 RE and VidRE/FW (17), Posp2-FW/ Posp2-RE (18), the primers described by Shamloul et al. (19)  
74 and AP-FW1/RE2 (20). Because of the lower analytical sensitivity of primers VidRE/FW (17) and  
75 the primers described by Spieker (21) no amplicon or sequence data were obtained for CLVd  
76 isolates from samples 6184939, PPS013 and PPS055. Therefore its presence and identity was  
77 verified by a CLVd-specific real-time RT-PCR published by Monger et al. (11). Amplicons were bi-  
78 directionally sequenced as described by Van de Vossenbergh and Van der Straten (22). The identity  
79 of the virus isolates was confirmed by ELISA or sequencing. The identity of *Clavibacter*  
80 *michiganensis* subsp. *michiganensis* was confirmed by real-time PCR and a pathogenicity test.

81

### 82 **Test development**

83 Complete genome sequences of the target species (CEVd, CLVd, PCFVd, PSTVd, TASVd,  
84 TCDVd and TPMVd) were retrieved from NCBI GenBank and the sequence database of the  
85 National Plant Protection Organization of the Netherlands. For all seven pospiviroids sequences of  
86 over 130 isolates covering the intra-species variation were selected. Sequences were aligned with  
87 the MAFFT alignment tool (23) in Geneious R8 (Biomatters) and manually adjusted. To minimise  
88 the number of reactions, primer and probe design focused on the conserved regions shared by  
89 different combinations of the seven species. Potentially suitable sites for primers and probes were  
90 visually identified and the oligonucleotide design further optimised using PrimerExpress 3 (Thermo  
91 Fischer Scientific). Primers and probes were tested in different combinations together with  
92 published primers and probes for CLVd (11), resulting in the selection of primers and probes listed  
93 in Table 2. Since the selected primers and probes could not be combined in one single reaction  
94 without losing (analytical) sensitivity, the final design of the Pospisense test consisted of two  
95 reactions run in parallel, named Pospisense 1 and Pospisense 2.  
96 In both reactions, dahlia latent viroid (DLVd; genus *Hostuviroid*) was included as an (exogenous)  
97 internal isolation control, which was detected by using the primers and probe (Table 2).

98

Table 1. Overview of isolates (targets and non-targets) and control material used in this study

|                                              | Reference code / GenBank acc. no. | Original host                 | Tested material <sup>a</sup> | Test development | Analytical sensitivity | Analytical specificity | Selectivity | Repeatability | Reproducibility | Robustness | Inter-laboratory comparison | Diagnostic sensitivity | Diagnostic specificity | relative accuracy |
|----------------------------------------------|-----------------------------------|-------------------------------|------------------------------|------------------|------------------------|------------------------|-------------|---------------|-----------------|------------|-----------------------------|------------------------|------------------------|-------------------|
| <b>targets</b>                               |                                   |                               |                              |                  |                        |                        |             |               |                 |            |                             |                        |                        |                   |
| <b>Pospiviroids</b>                          |                                   |                               |                              |                  |                        |                        |             |               |                 |            |                             |                        |                        |                   |
| <i>Citrus exocortis viroid</i> (CEVd)        | 4719338                           | <i>Hibiscus</i>               | 1                            | x                |                        | x                      |             |               |                 |            |                             |                        |                        | x                 |
|                                              | 4719389                           | <i>Hibiscus</i>               | 1                            | x                |                        | x                      |             |               |                 |            |                             |                        |                        | x                 |
|                                              | 3823889/ EU094208                 | <i>Solanum jasminoides</i>    | 1                            | x                |                        | x                      |             |               |                 |            |                             |                        |                        | x                 |
|                                              | 3823889/ EU094208                 | <i>Solanum jasminoides</i>    | 3                            |                  | x                      |                        | x           | x             | x               |            | x                           |                        |                        |                   |
|                                              | 89002594/ AY372391                | <i>Solanum lycopersicum</i>   | 1                            | x                |                        | x                      |             |               |                 |            |                             |                        |                        | x                 |
|                                              | 89002600/ AY372393                | <i>Solanum lycopersicum</i>   | 1                            | x                |                        | x                      |             |               |                 |            |                             |                        |                        | x                 |
| <i>Columnnea latent viroid</i> (CLVd)        | 3123575/ EF192396                 | <i>Verbena</i>                | 1                            | x                |                        | x                      |             |               |                 |            |                             |                        |                        | x                 |
|                                              | 6184939                           | <i>Capsicum annuum</i>        | 2                            |                  |                        |                        |             |               |                 |            |                             |                        |                        | x                 |
|                                              | 6184939                           | <i>Capsicum annuum</i>        | 3                            |                  | x                      | x                      | x           |               | x               |            | x                           |                        |                        |                   |
|                                              | PPS013                            | <i>Capsicum annuum</i>        | 3                            |                  | x                      | x                      | x           |               | x               |            | x                           |                        |                        | x                 |
|                                              | PPS055                            | <i>Capsicum annuum</i>        | 3                            |                  |                        | x                      | x           |               | x               |            | x                           |                        |                        | x                 |
|                                              | 4812065                           | <i>Nemanthantus</i> sp.       | 1                            | x                | x                      | x                      | x           |               |                 |            |                             |                        |                        | x                 |
| <i>Pepper chat fruit viroid</i> (PCFVd)      | 93007481/ AY372392                | <i>Solanum lycopersicum</i>   | 1                            | x                |                        |                        |             |               |                 |            |                             |                        |                        | x                 |
|                                              | 93007481/ AY372392                | <i>Solanum lycopersicum</i>   | 2 <sup>b</sup>               |                  | x                      | x                      |             |               |                 |            |                             |                        |                        |                   |
|                                              | 20904730                          | <i>Solanum lycopersicum</i>   | 2                            |                  |                        | x                      |             |               |                 |            |                             |                        |                        |                   |
|                                              | 6184939                           | <i>Capsicum annuum</i>        | 2                            |                  |                        |                        |             |               |                 |            |                             |                        |                        | x                 |
|                                              | 6184939                           | <i>Capsicum annuum</i>        | 3                            |                  | x                      | x                      | x           |               | x               |            | x                           |                        |                        |                   |
|                                              | 3259237/ FJ409044                 | <i>Capsicum annuum</i>        | 1                            | x                | x                      | x                      | x           |               |                 |            |                             |                        |                        | x                 |
| <i>Potato spindle tuber viroid</i> (PSTVd)   | PPS013                            | <i>Capsicum annuum</i>        | 3                            |                  | x                      | x                      | x           |               | x               |            | x                           |                        |                        | x                 |
|                                              | 20904730                          | <i>Solanum lycopersicum</i>   | 2                            |                  |                        | x                      |             |               |                 |            |                             |                        |                        |                   |
|                                              | 5557027                           | <i>Capsicum annuum</i>        | 3                            | x                |                        | x                      |             |               |                 |            |                             |                        |                        | x                 |
|                                              | 5557051                           | <i>Capsicum annuum</i>        | 3                            |                  |                        | x                      |             |               |                 |            |                             |                        |                        |                   |
|                                              | 5558839                           | <i>Capsicum annuum</i>        | 3                            | x                |                        | x                      |             |               |                 |            |                             |                        |                        | x                 |
|                                              | 5558927                           | <i>Capsicum annuum</i>        | 3                            |                  |                        | x                      |             |               |                 |            |                             |                        |                        |                   |
|                                              | 5785531                           | <i>Capsicum annuum</i>        | 3                            | x                |                        | x                      |             |               |                 |            |                             |                        |                        | x                 |
|                                              | 6744916                           | <i>Capsicum annuum</i>        | 4                            | x                |                        | x                      |             |               |                 |            |                             |                        |                        | x                 |
|                                              | PPS020                            | <i>Capsicum annuum</i>        | 3                            |                  | x                      | x                      | x           |               | x               |            | x                           |                        |                        | x                 |
|                                              | 5895974/ AY372400                 | <i>Solanum commersonii</i>    | 1                            | x                |                        | x                      |             |               |                 |            |                             |                        |                        | x                 |
|                                              | 5458889                           | <i>Solanum lycopersicum</i>   | 1                            | x                |                        | x                      |             |               |                 |            |                             |                        |                        | x                 |
|                                              | 5558898                           | <i>Solanum lycopersicum</i>   | 2                            |                  |                        | x                      |             |               |                 |            |                             |                        |                        |                   |
|                                              | 5558900                           | <i>Solanum lycopersicum</i>   | 2                            |                  |                        | x                      |             |               |                 |            |                             |                        |                        |                   |
|                                              | 5785652                           | <i>Solanum lycopersicum</i>   | 2                            |                  |                        | x                      |             |               |                 |            |                             |                        |                        |                   |
|                                              | 5785664                           | <i>Solanum lycopersicum</i>   | 2                            |                  |                        | x                      |             |               |                 |            |                             |                        |                        |                   |
|                                              | 5785695                           | <i>Solanum lycopersicum</i>   | 2                            |                  |                        | x                      |             |               |                 |            |                             |                        |                        |                   |
| 6586364                                      | <i>Solanum lycopersicum</i>       | 2                             |                              |                  | x                      |                        |             |               |                 |            |                             |                        |                        |                   |
| 6586372                                      | <i>Solanum lycopersicum</i>       | 2                             |                              |                  | x                      |                        |             |               |                 |            |                             |                        |                        |                   |
| <i>Tomato apical stunt viroid</i> (TASVd)    | M16826                            | <i>Solanum lycopersicum</i>   | 1                            | x                |                        | x                      |             |               |                 |            |                             |                        |                        | x                 |
|                                              | N3/ X17268                        | <i>Solanum lycopersicum</i>   | 1                            | x                |                        | x                      |             |               |                 |            |                             |                        |                        | x                 |
|                                              | 3497501                           | <i>Streptosolen jamesonii</i> | 1                            | x                |                        | x                      |             |               |                 |            |                             |                        |                        | x                 |
|                                              | 5348604                           | <i>Brugmansia</i>             | 5                            | x                |                        | x                      |             |               |                 |            |                             |                        |                        |                   |
|                                              | 5458774/ KX579067                 | <i>Capsicum annuum</i>        | 4                            | x                |                        | x                      |             |               |                 |            |                             |                        |                        |                   |
|                                              | PPS055                            | <i>Capsicum annuum</i>        | 3                            |                  | x                      | x                      | x           |               | x               |            | x                           |                        |                        | x                 |
|                                              | 3153272                           | <i>Cestrum</i>                | 1                            | x                |                        | x                      |             |               |                 |            |                             |                        |                        | x                 |
|                                              | 2010990                           | <i>Solanum lycopersicum</i>   | 1                            | x                |                        | x                      |             |               |                 |            |                             |                        |                        | x                 |
|                                              | 4127051                           | <i>Solanum lycopersicum</i>   | 1                            | x                |                        |                        |             |               |                 |            |                             |                        |                        |                   |
|                                              | 4127051                           | <i>Solanum lycopersicum</i>   | 2 <sup>b</sup>               |                  | x                      | x                      | x           |               | x               |            | x                           |                        |                        | x                 |
| <i>Tomato chlorotic dwarf viroid</i> (TCDVd) | 5962508                           | <i>Solanum lycopersicum</i>   | 1                            | x                |                        | x                      |             |               |                 |            |                             |                        |                        | x                 |
|                                              | 3816013/ EF626530                 | <i>Brugmansia sanguinea</i>   | 1                            | x                |                        | x                      |             |               |                 |            |                             |                        |                        | x                 |
|                                              | 5345261                           | <i>Petunia</i>                | 2 <sup>b</sup>               |                  | x                      | x                      | x           |               | x               |            | x                           |                        |                        | x                 |
|                                              | 5783657                           | <i>Petunia</i>                | 5                            | x                |                        |                        |             |               |                 |            |                             |                        |                        |                   |
|                                              | 5783710                           | <i>Petunia</i>                | 5                            | x                |                        |                        |             |               |                 |            |                             |                        |                        |                   |
|                                              | 3992641                           | <i>Solanum lycopersicum</i>   | 1                            | x                |                        | x                      |             |               |                 |            |                             |                        |                        | x                 |
|                                              | 4888596                           | <i>Solanum lycopersicum</i>   | 1                            | x                |                        | x                      |             |               |                 |            |                             |                        |                        | x                 |
|                                              | 22006456/ AY372399                | <i>Solanum lycopersicum</i>   | 1                            | x                |                        | x                      |             |               |                 |            |                             |                        |                        | x                 |
|                                              | A4                                | unknown                       | 1                            |                  |                        | x                      |             |               |                 |            |                             |                        |                        | x                 |

Table 1. (Continued)

|                                                              | Reference code /<br>GenBank acc. no. | Original host                | Tested material <sup>a</sup> | Test development | Analytical sensitivity | Analytical specificity | Selectivity | Repeatability          | Reproducibility | Robustness | Inter-laboratory comparison | Diagnostic sensitivity | Diagnostic specificity | relative accuracy |
|--------------------------------------------------------------|--------------------------------------|------------------------------|------------------------------|------------------|------------------------|------------------------|-------------|------------------------|-----------------|------------|-----------------------------|------------------------|------------------------|-------------------|
| <b>targets</b>                                               |                                      |                              |                              |                  |                        |                        |             |                        |                 |            |                             |                        |                        |                   |
| <i>Tomato planta macho viroid</i> (TPMVd)                    | OG1/ L78454                          | <i>Solanum cardiophyllum</i> | 1                            | x                |                        | x                      |             |                        |                 |            |                             |                        |                        | x                 |
|                                                              | 3601768                              | <i>Solanum lycopersicum</i>  | 1                            | x                |                        | x                      |             |                        |                 |            |                             |                        |                        | x                 |
|                                                              | 3289954/ K00817                      | <i>Solanum lycopersicum</i>  | 1                            |                  |                        |                        |             |                        |                 |            |                             |                        |                        | x                 |
|                                                              | 3289954/ K00817                      | <i>Solanum lycopersicum</i>  | 2 <sup>b</sup>               | x                | x                      | x                      | x           | x                      | x               | x          | x                           | x                      | x                      | x                 |
| <b>non-targets</b>                                           |                                      |                              |                              |                  |                        |                        |             |                        |                 |            |                             |                        |                        |                   |
| <b>Pospiviroidae</b>                                         |                                      |                              |                              |                  |                        |                        |             |                        |                 |            |                             |                        |                        |                   |
| <i>Chrysanthemum stunt viroid</i> (CSVd)                     | 9501859/ U82445                      | <i>Petunia</i>               | 1                            |                  |                        | x                      |             |                        |                 |            |                             |                        |                        |                   |
|                                                              | 4308774                              | <i>Pericallis</i>            | 5                            |                  |                        | x                      |             |                        |                 |            |                             |                        |                        |                   |
| <i>Hop stunt viroid</i> (HpSVd)                              | YP9352                               | <i>unknown</i>               | 5                            |                  |                        | x                      |             |                        |                 |            |                             |                        |                        |                   |
| <i>Iresine viroid 1</i> (IrVd-1)                             | 4416011/ GU911350                    | <i>Celosia plumosa</i>       | 5                            |                  |                        | x                      |             |                        |                 |            |                             |                        |                        |                   |
|                                                              | Naktuinbouw                          | <i>Verbena</i>               | 5                            |                  |                        | x                      |             |                        |                 |            |                             |                        |                        |                   |
| <b>Avsunviroidae</b>                                         |                                      |                              |                              |                  |                        |                        |             |                        |                 |            |                             |                        |                        |                   |
| <i>Eggplant latent viroid</i> (ELVd)                         | 5421357                              | <i>Solanum melongena</i>     |                              |                  |                        | x                      |             |                        |                 |            |                             |                        |                        |                   |
| <b>Pepper and tomato infecting viruses</b>                   |                                      |                              |                              |                  |                        |                        |             |                        |                 |            |                             |                        |                        |                   |
| <i>Alfalfa mosaic virus</i> (AMV)                            | Q0300019                             | <i>Solanum kurtzianum</i>    | 4                            |                  |                        | x                      |             |                        |                 |            |                             |                        |                        |                   |
| <i>Cucumber mosaic virus</i> (CMV)                           | 5473587                              | <i>Solanum lycopersicum</i>  | 5                            |                  |                        | x                      |             |                        |                 |            |                             |                        |                        |                   |
| <i>Pepino mosaic virus</i> (PepMV)                           | 3829631                              | <i>Solanum lycopersicum</i>  | 4                            |                  |                        | x                      |             |                        |                 |            |                             |                        |                        |                   |
| <i>Pepper mild mottle virus</i> (PMMoV)                      | 21005888                             | <i>Capsicum annuum</i>       | 5                            |                  |                        | x                      |             |                        |                 |            |                             |                        |                        |                   |
| <i>Potato virus Y</i> (PVY)                                  | 4225768                              | <i>Solanum tuberosum</i>     | 4                            |                  |                        | x                      |             |                        |                 |            |                             |                        |                        |                   |
| <i>Tobacco mosaic virus</i> (TMV)                            | 6183848                              | <i>unknown</i>               | 4                            |                  |                        | x                      |             |                        |                 |            |                             |                        |                        |                   |
| <i>Tomato chlorosis virus</i> (ToCV)                         | 4343668                              | <i>Solanum lycopersicum</i>  | 5                            |                  |                        | x                      |             |                        |                 |            |                             |                        |                        |                   |
| <i>Tomato infectious chlorosis virus</i> (TICV)              | 99913778                             | <i>Solanum lycopersicum</i>  | 5                            |                  |                        | x                      |             |                        |                 |            |                             |                        |                        |                   |
|                                                              | 22005209                             | <i>Solanum lycopersicum</i>  | 5                            |                  |                        | x                      |             |                        |                 |            |                             |                        |                        |                   |
| <i>Tomato mosaic virus</i> (ToMV)                            | 6184840                              | <i>unknown</i>               | 4                            |                  |                        | x                      |             |                        |                 |            |                             |                        |                        |                   |
| <i>Tomato spotted wilt virus</i> (TSWV)                      | 21007721                             | <i>Ligularia</i> spp.        | 4                            |                  |                        | x                      |             |                        |                 |            |                             |                        |                        |                   |
| <i>Tomato yellowleaf curl virus</i> (TYLCV)                  | 3181291                              | <i>Solanum lycopersicum</i>  | 5                            |                  |                        | x                      |             |                        |                 |            |                             |                        |                        |                   |
| <i>Clavibacter michiganensis</i> subsp. <i>michiganensis</i> | ZZB 655                              | <i>Solanum lycopersicum</i>  | 2                            |                  |                        | x                      |             |                        |                 |            |                             |                        |                        |                   |
| <b>negative controls (seed)</b>                              |                                      |                              |                              |                  |                        |                        |             |                        |                 |            |                             |                        |                        |                   |
|                                                              | PPS045                               | <i>Capsicum annuum</i>       | 3                            |                  |                        |                        | x           |                        |                 |            |                             |                        |                        | x                 |
|                                                              | ZZB 379                              | <i>Capsicum annuum</i>       | 3                            |                  |                        |                        | x           |                        |                 |            |                             |                        |                        | x                 |
|                                                              | 6184891                              | <i>Solanum lycopersicum</i>  | 2                            |                  |                        |                        | x           |                        |                 |            |                             |                        |                        | x                 |
|                                                              | ZZB 649                              | <i>Solanum lycopersicum</i>  | 2                            |                  |                        |                        | x           |                        |                 |            |                             |                        |                        | x                 |
| <b>Total # isolates</b>                                      |                                      |                              | <b>33</b>                    | <b>13</b>        | <b>70</b>              | <b>17</b>              | <b>11</b>   | <b>11</b> <sup>c</sup> | <b>43</b>       |            |                             |                        |                        |                   |

<sup>a</sup> Tested material: 1 *Solanum lycopersicum*: leaf material; 2 *S. lycopersicum*: seed ; 3 *Capsicum annuum*: seed; 4 Solanaceous test plant species other than *S. lycopersicum* ; 5 Original host species

<sup>b</sup> Sample consisting of 999 non-infested seeds and one seed infested with either TASVd, TCDVd or TPMVd, originating from an experimentally-infected tomato plant

<sup>c</sup> Eleven isolates in eight samples

Table 2. Primers and probes sequences of Pospisense test

| Primers & Probes        | Sequence (5'-3')                                    | Ref.       |
|-------------------------|-----------------------------------------------------|------------|
| <b>Pospisense 1</b>     |                                                     |            |
| PospiFW1                | TGCGCTGTCGCTTCG                                     | this paper |
| PospiFW5a               | CCTTCCTTTCTTCGGGTTTC                                | this paper |
| PospiRV1                | AGAAAAAGCGGCGCTTG                                   | this paper |
| PospiRV2                | TAGAGAAAAAGCGGTTCTCGG                               | this paper |
| PospiRV5a               | GAAAAAGCACCTCTGTCAGTTGTA                            | this paper |
| CLVd-F                  | GGTTCACACCTGACCCTGCAG                               | (11)       |
| CLVd-F2                 | AAACTCGTGGTTCTGTGGTT                                | (11)       |
| CLVd-R                  | CGCTCGGTCTGAGTTGCC                                  | (11)       |
| PospiP1a                | <i>FAM</i> -CGGTGGAACAACACTG- <i>MGB</i>            | this paper |
| PospiP3a                | <i>FAM</i> -CGGCCTTCTCGCGCA- <i>MGB</i>             | this paper |
| CLVd-P                  | <i>FAM</i> -AGCGGTCTCAGGAGCCCCGG- <i>BHQ1</i>       | (11)       |
| <b>Pospisense 2</b>     |                                                     |            |
| PospiFW6a               | GGATCTTTCTTGAGGTTCTCTGT                             | this paper |
| PospiFW6b               | GGAACCTTTCTTGAGGTTCTCTGT                            | this paper |
| PospiFW6c               | TCTTTCCTTGTTGGTTCTCTGTG                             | this paper |
| PospiRV6a               | CGACTTCCTCCAGGTTTCC                                 | this paper |
| PospiP5                 | <i>FAM</i> -CTGCAGGGTCAGGTG- <i>MGB</i>             | this paper |
| <b>Internal Control</b> |                                                     |            |
| DaVd1-FT                | GCTCCGCTCCTTGAGCTTT                                 | this paper |
| DaVd1-RT                | AGGAGGTGGAGACCTTGG                                  | this paper |
| DaVd1-P                 | <i>Texas Red</i> -CTGACTCGAGGACGCGACCG- <i>BHQ2</i> | this paper |

## Sample preparation and RNA extraction

### Seeds

Samples of tomato seeds consisted of c. 3000 seeds, which were divided in three subsamples of c.1000 seeds for testing, according to standard procedures used by seed testing laboratories in Europe (16).

Seeds were processed by either using a Geno/Grinder (SPex SamplePrep P) or a BagMixer 100 (Interscience), depending on the laboratory's preference. When using the Geno/Grinder (dry processing) 3x 1000 tomato seeds were transferred to a 50 ml tube containing a 14 mm steel ball. Tubes were put upside down and seeds ground at 1500 rpm for 4 min (at least 95% seeds crushed). After grinding, 20 ml GH+ extraction buffer ((9); modified by (24)) which included the DLVd spike, was added to each tube. The DLVd-spike stock of 1 g DLVd-infected leaf material homogenised in 10 ml GH+ buffer was used at a dilution of approximately  $10^{-4}$  to achieve a Cq value of about 28. To obtain homogenous solutions the tubes were shaken manually. When using

117 the BagMixer (wet processing) subsamples of 1000 tomato seeds were transferred to a grinding  
118 bag (BagPage 100ml (Interscience) and soaked in 20 ml GH+ buffer spiked with DLVd at room  
119 temperature for 30-60 min and subsequently blended for 1.5 min at position 4.  
120 For pepper seeds the same procedure was followed except that the subsamples of c.1000 seeds  
121 were subdivided into 2x500 seeds before grinding with a Geno/Grinder for 7 min. After grinding 10  
122 ml DLVd-spiked GH+ extraction buffer was added to each of the six tubes, followed by combining  
123 and mixing of the contents of the two tubes of a subsample before further processing.  
124 For RNA extraction, 1 ml of the seed homogenate was transferred into a 1.5 ml tube and 30 µl of  
125 5M Dithiothreitol was added, followed by incubation in a thermoshaker at 850 rpm, 65°C for 15  
126 min. The tubes were centrifuged at 16,000 g for 10 min. For manual RNA extraction using the  
127 RNeasy plant mini kit (Qiagen), 750 µl of the supernatant was used following the manufacturer's  
128 instructions. For large-scale RNA extraction on a Kingfisher KF96 system (Thermo Fisher  
129 Scientific), using the Sbeadex Maxi Plant kit (LGC), 250 µl of supernatant was transferred to a  
130 binding plate containing 600 µl of binding buffer and 50 µl Sbeadex particle suspension, following  
131 the manufacturer's instructions.

132

## 133 **Leaves**

134 Sample preparation and RNA extraction from leaf material (Table 1) was performed according to  
135 Botermans et al. (9).

136

## 137 **Pospisense real-time RT-PCR**

138 Table 2 lists the primer and probe sequences used for the Pospisense test. The Pospisense 1  
139 reaction contained: 1x UltraPlex 1-Step ToughMix (Quanta Biosciences), 0.3 µM of each  
140 Pospisense 1 and internal control primer, 0.1 µM of TaqMan probe Pospip1a, Pospip3a, CLVd-P,  
141 0.2 µM of internal control TaqMan probe DaVd1-P, 2 µl RNA template and molecular grade water  
142 to a final volume of 20 µl. The Pospisense 2 reaction included: 1x UltraPlex 1-Step ToughMix  
143 (Quanta Biosciences), 0.3 µM of each Pospisense 2 and internal control primer, 0.1 µM of TaqMan  
144 probe Pospip5, 0.2 µM of internal control TaqMan probe DaVd1-P, 2 µl RNA template and



145 molecular grade water to a final volume of 20  $\mu$ l. Both reactions used real-time RT-PCR: 10 min  
146 50°C, 3 min 95°C, followed by 40 cycles 10 s 95°C and 1 min 60°C. Real-time RT-PCRs were  
147 carried out in 96-well plates on a Bio-Rad CFX96™ Real-Time PCR system (Bio-Rad  
148 Laboratories,) or a QuantStudio™ 6 Flex Real-Time PCR System (Thermo Fisher Scientific). After  
149 verification of controls, a test result was considered positive if an exponential amplification curve  
150 was produced for either the Pospisense 1 and/or the Pospisense 2 reaction.

151

## 152 **Results**

### 153 **Test development and validation**

154 Table 2 shows the primers and probes that were selected for further validation, based on the  
155 results of the initial tests. To determine whether the Pospisense test is suitable for routine testing  
156 of seed lots, the following performance characteristics were determined: analytical sensitivity,  
157 analytical specificity, selectivity, repeatability and reproducibility, according to the EPPO standard  
158 PM7/98 version 4 (25). In addition, the Pospisense test was compared with the currently most-  
159 commonly used test (14, 15) for diagnostic sensitivity, diagnostic specificity and relative accuracy  
160 (25). Table 1 indicates the isolates used to determine each of the performance characteristics.

161

### 162 **Analytical sensitivity**

163 To determine the analytical sensitivity, RNA-extracts of pepper or tomato seeds naturally infested  
164 by CLVd, PSTVd or TASVd (one isolate each) were diluted in duplicate in RNA-extracts of non-  
165 infested seeds. Testing of RNA extracts of decimal dilutions revealed that these three pospiviroids  
166 showed 100% detection up to 1000, 10.000 and 100 times dilution respectively. Furthermore,  
167 testing samples consisting of one tomato seed infested by either CLVd, TASVd, TCDVd or TPMVd,  
168 and 999 non-infested seeds, produced consistent positive results. In comparison to the  
169 Naktuinbouw test, the Pospisense test appeared less sensitive for detection of CEVd and TASVd,  
170 (difference for CEVd  $\Delta$ Cq= 6.1 SD=3.2 n=6 and TASVd  $\Delta$ Cq= 4.0 SD=1.4 n=5, based on average

171 values of both leaf and seed samples in a range of concentrations). Nevertheless, the Pospisense  
172 test meets the requirements of detecting one infested seed in a sample of c.1000 seeds.

## 174 Analytical specificity

175 The analytical specificity was determined by testing infected leaf and infested seed samples by  
176 target and non-target species (see Table 1). The Pospisense test gave positive results for all 51  
177 tested isolates of the seven target pospiviroids, i.e. CEVd (6), CLVd (6), PCFVd (4), PSTVd (19),  
178 TASVd (7), TCDVd (6) and TPMVd (3), thus showing coverage of the intra-species variability  
179 (inclusivity). For 12 non-targets (exclusivity), no cross-reactions were observed, i.e. for hop stunt  
180 viroid (hostuviroid), and most common pepper- and tomato-infecting viruses, i.e. alfalfa mosaic  
181 virus, cucumber mosaic virus, pepper mild mottle virus, pepino mosaic virus, potato virus Y,  
182 tobacco mosaic virus, tomato chlorosis virus, tomato mosaic virus, tomato spotted wilt virus and  
183 tomato yellow leaf curl virus. In addition, no cross-reactions were found for the bacterium  
184 *Clavibacter michiganensis* subsp. *michiganensis*. For four non-targets, i.e. Chrysanthemum stunt  
185 viroid (CSVd), eggplant latent viroid (genus *Elaviroid*) and Iresine viroid 1 (IrVd-1), cross-reactions  
186 (Cq= 27-37) were observed when present in high concentrations. Of these viroid species, however,  
187 no natural infections in pepper and tomato have been reported. In addition, one out of two isolates  
188 of tomato infectious chlorosis virus showed some cross-reactivity when present in high  
189 concentration, which is not likely for seeds. Moreover during confirmatory testing, false positives  
190 will be revealed and abolished. Therefore, the observed cross-reactions will not hamper the  
191 application of the Pospisense test for screening seed lots.

## 193 Selectivity

194 To determine the effect of the matrix, RNA extracts of seeds containing RNA of each of the target  
195 species were diluted in either RNA-extracts of non-infested seeds or water (Table 1). Test results  
196 of serial dilutions of the RNA extracts were compared. For both pepper and tomato seeds only  
197 minor differences were observed, i.e. average  $\Delta$  Cq water: pepper seed= 0.4 and average  $\Delta$  Cq

198 water: tomato seed= 0.6. Regarding selectivity, therefore, it was concluded that no apparent matrix  
199 effects occurred in both pepper and tomato seeds.

200

## 201 **Repeatability and Reproducibility**

202 Repeatability and reproducibility were determined by analysing sub-samples of pepper and tomato  
203 seeds under the same experimental conditions (technical replicates) and under different  
204 experimental conditions (date, operator, apparatus, *etc.*), including an inter-laboratory comparison.  
205 Eight samples of pepper and tomato seeds infested by the seven relevant pospiviroids (11  
206 isolates) were selected. The RNA extracts of these samples with medium to low relative infestation  
207 rates (Cq values of targets varying between 20 and 32) were sub-sampled and tested by the three  
208 participating laboratories, including two routine seed-testing laboratories. Qualitative interpretation  
209 of the resulting data showed concordance for all (sub-) samples, both within and between  
210 laboratories, and irrespective of variation in experimental conditions (Table 3a,b). Repeatability and  
211 reproducibility were 100%, further demonstrating the robustness of the Pospisense test.

212

## 213 **Diagnostic sensitivity, diagnostic specificity and relative accuracy**

214 To determine the relative accuracy of the Pospisense test, test results were compared with the  
215 results obtained with the with the most-commonly used pospiviroid seed test of Naktuinbouw  
216 (2017a,b,c). In total, 43 samples including both infested and non-infested seed samples were  
217 tested with both tests. Positive and negative results were compared qualitatively. The Pospisense  
218 and the Naktuinbouw test both diagnosed the same number of positive (n=39; Naktuinbouw test  
219 Cq 12-31, Pospisense test Cq 10-34) and negative (n=4) results. Consequently, diagnostic  
220 sensitivity, diagnostic specificity and relative accuracy were all 100% in comparison with the  
221 Naktuinbouw test.

222

Table 3a. Results (Cq values) of the repeatability and reproducibility experiments in intra- and inter-laboratory setting (Pospisense 1)

| Isolate                    | Matrix (seed) | Pospisense 1, Test Moment 1-6 <sup>a</sup> |       |       |       |                      |       |
|----------------------------|---------------|--------------------------------------------|-------|-------|-------|----------------------|-------|
|                            |               | NPPO Lab                                   |       |       |       | Lab 1                | Lab 2 |
|                            |               | 1                                          | 2     | 3     | 4     | 5                    | 6     |
| PSTVd PPS020               | Pepper        | 22/22                                      | 22    |       |       | 23                   |       |
| TASVd + CLVd PPS055        | Pepper        | 25/25                                      | 25    |       |       | 26                   |       |
| PCFVd + CLVd PPS013        | Pepper        | 24                                         | 25/24 |       |       | 28(VIC) <sup>d</sup> |       |
| TCDVd 5345261 <sup>b</sup> | Tomato        | 24                                         | 24/24 |       |       |                      | 23    |
| TPMVd 3289954 <sup>b</sup> | Tomato        |                                            |       | 29/30 | 30    |                      | 28    |
| TASVd 4127051 <sup>b</sup> | Tomato        |                                            |       | ND/ND | ND    |                      | ND    |
| PCFVd + CLVd 6184939       | Pepper        |                                            |       | 23    | 22/22 |                      | 22    |
| CEVd 3823889 <sup>c</sup>  | Pepper        |                                            |       | ND    | ND/ND |                      | ND    |

Table 3b. Results (Cq values) of the repeatability and reproducibility experiments in intra- and inter-laboratory setting (Pospisense 2)

| Isolate                    | Matrix (seed) | Pospisense 2, Test Moment 1-6 <sup>a</sup> |       |       |       |       |       |
|----------------------------|---------------|--------------------------------------------|-------|-------|-------|-------|-------|
|                            |               | NPPO Lab                                   |       |       |       | Lab 1 | Lab 2 |
|                            |               | 1                                          | 2     | 3     | 4     | 5     | 6     |
| PSTVd PPS020               | Pepper        | ND/ND                                      | ND    |       |       | ND    |       |
| TASVd + CLVd PPS055        | Pepper        | 25/25                                      | 25    |       |       | 25    |       |
| PCFVd + CLVd PPS013        | Pepper        | 37                                         | 37/37 |       |       | 38    |       |
| TCDVd 5345261 <sup>b</sup> | Tomato        | ND                                         | ND/ND |       |       |       | ND    |
| TPMVd 3289954 <sup>b</sup> | Tomato        |                                            |       | ND/ND | ND    |       | ND    |
| TASVd 4127051 <sup>b</sup> | Tomato        |                                            |       | 32/32 | 32    |       | 31    |
| PCFVd + CLVd 6184939       | Pepper        |                                            |       | 37    | 37/37 |       | 37    |
| CEVd 3823889 <sup>c</sup>  | Pepper        |                                            |       | 20    | 20/20 |       | 19    |

<sup>a</sup> 1-6 = Moment at which test is performed by a different operator

<sup>b</sup> RNA extract from sample consisting of 999 non-infested seeds and one seed infested with TASVd, TCDVd or TPMVd, originating from an artificially infected tomato plant.

<sup>c</sup> RNA extract from seed spiked with CEVd

<sup>d</sup> PCFVd specific probe was accidentally labeled with VIC instead of FAM fluorophore, explaining slightly different cq values

ND = not detected (negative test result)

Test results of internal control were positive (data not shown)

## Discussion

The newly developed Pospisense test has been shown to fulfil the requirements for routine testing of pepper and tomato seed samples for the seven pospiviroid species known to occur naturally in these crops. The validation data showed that for CLVd, TASVd, TCDVd and TPMVd the test allows detection of at least one infested seed in a sample of 1000 seeds. For PSTVd similar results were obtained for single seeds from a naturally infested seed lot. For CEVd no infested seed samples were available, and for PCFVd only seed samples co-infested with CLVd. Therefore, the analytical

232 sensitivity could not be experimentally determined. However, the results are expected to be similar,  
233 because these pospiviroids are likely to share both physical and biological characteristics with  
234 other members in the genus. Moreover, regarding test performance, the analytical sensitivity for  
235 CEVd and PCFVd for leaf material is within the same range as the other pospiviroids. In addition,  
236 the results of the wide range of targets and non-targets tested, as well as the absence of matrix  
237 effects, showed its suitability for screening both pepper and tomato seeds. A 100% repeatability  
238 and reproducibility were obtained during validation and inter-laboratory comparison, both further  
239 demonstrating the robustness of the Pospisense test.

240 For routine screening of seed lots, the Pospisense test offers some improvements in comparison  
241 with the currently used real-time RT-PCR pospiviroid tests. Firstly, the test is more sensitive than  
242 the other (semi-) generic pospiviroid tests as described by Monger et al. (11) and Botermans et al.  
243 (9), which both lack the sensitivity needed for reliable seed testing. Secondly, the Pospisense test  
244 is less complex than the pospiviroid seed test of Naktuinbouw (14, 15) and its performance  
245 characteristics generally comparable, although the analytical sensitivity of the Pospisense is  
246 slightly lower for CEVd and TASVd. In addition, the comparison of both tests showed a 100%  
247 agreement. However, in comparison to the Naktuinbouw test, the Pospisense test consists of two  
248 instead of four parallel reactions and uses only one internal control (DLVd) and one fluorophore. In  
249 both reactions, DLVd is spiked as internal isolation control. This control appeared a more  
250 consistent control for seed testing than the host-derived nad5, which often produces variable Cq  
251 values due to differences in cell physiology. The characteristics of the DLVd control are similar to  
252 the targets and its secondary structure is likely to prevent it from degradation by RNases. Another  
253 factor contributing to the lesser complexity of the Pospisense test is the choice of using the same  
254 fluorophore for all target species, as it makes the interpretation of test results easier. There is little  
255 chance of confusing results caused by cross-reactions between different primers and probes  
256 and/or the presence of more than one pospiviroid species in a sample. Nevertheless, it is possible  
257 to include additional fluorophores if discrimination among species at the screening stage is  
258 desirable.

259 The Pospisense test has been developed for efficient testing of seeds by combining the detection  
260 of seven pospiviroid species. This implies that in the case of a positive result, at least one

261 pospiviroid species could be present and additional tests are needed for the identification of the  
262 species. Specific real-time RT-PCR tests have been developed to detect CEVd, CLVd, TASVd  
263 (26), and PCFVd (14, 15). For the closely related species PSTVd, TCDVd and TPMVd, the real-  
264 time RT-PCR test described by Boonham et al. (2004) can be used for confirmation, but by  
265 detecting all these three pospiviroids (except for one TPMVd isolate), the test is not able to  
266 distinguish between these species. Consequently, these three species can only be distinguished  
267 and identified by sequencing the amplicons obtained by conventional RT-PCR. Furthermore, it  
268 should be noted that for confirmation, a different test, preferably targeting a different region of the  
269 genome, should be used. However, the identification of pospiviroids in seed lots is not always  
270 easy, since viroid concentrations are generally low. Identification has even become more  
271 challenging because of the increased sensitivity of the recently developed real-time RT-PCR tests,  
272 including the Pospisense test described in this paper. According to the International Committee on  
273 Taxonomy of Viruses (27), the identification of viroids should be based on the analysis of their  
274 complete genome. Complete sequences, however, are still difficult or impossible to obtain from  
275 seed samples with low viroid levels, because conventional RT-PCR tests lack the required  
276 sensitivity to produce full-length amplicons. In addition, in comparison to real-time RT-PCR tests,  
277 conventional RT-PCRs are generally more prone to inhibition by matrix components. This means  
278 that seed treatments might have more impact on the analytical sensitivity of the conventional RT-  
279 PCR tests. For the identification of pospiviroid species in seed samples, the primer set Posp1-  
280 FW/Posp1-RE described by Verhoeven et al. (17) appeared most suitable due to its relatively high  
281 analytical sensitivity (28) When combining this test with the primer set Posp2-FW/ Posp2-RE (18),  
282 complete genome sequences of all known pospiviroids (except for CLVd) can be obtained, since  
283 these two primer pairs anneal at the same loci but in opposite polarity. However, often tailor-made  
284 solutions are needed for the confirmation and identification of pospiviroids in seed samples, e.g.  
285 concentration methods (29) nested-RT-PCR, or pooling of PCR-products for further testing.  
286 In conclusion, the performance of the Pospisense test, combined with the need of only two parallel  
287 reactions and a limited number of probes, shows its perspectives as an alternative test for  
288 screening seed lots of solanaceous species.

289

## Acknowledgements

We would like to thank Adrian Fox and colleagues from Fera Science Ltd (York, UK) and Ricardo Flores from Instituto de Biología Molecular y Celular de Plantas (UPV-CSIC) (Valencia, Spain) for providing isolates, and Joris Voogd, Tim Warbroek and Maureen Bruil for technical assistance.

## References

1. Candresse T, Verhoeven JTJ, Stancanelli, Hammond W, Winter S. Other pospiviroids infecting solanaceous plants. In: Hadidi A, Flores R, Palukaitis P, Randles J, editors. *Viroids and Satellites*. London: Elsevier Academic Press; 2017. p. 159-68
2. Owens RA, Verhoeven JTJ. Potato spindle tuber viroid. In: Hadidi A, Flores R, Palukaitis P, Randles J, editors. *Viroids and Satellites*. London: Elsevier Academic Press; 2017. p. 149-58.
3. Hammond RW. Seed, pollen and insect transmission of viroids. In: Hadidi A, Flores R, Randles JW, Palukaitis P, editors. *Viroids and Satellites*. London: Elsevier Academic Press 2017. p. 521-30.
4. Škorić D. Viroid Biology. In: Hadidi A, Flores R, Randles JW, Palukaitis P, editors. *Viroids and Satellites*. London: Academic Press; 2017. p. 53-61.
5. Faggioli F, Luigi M, Sveikauskas V, Olivier T, Marn MV, Plesko IM, et al. An assessment of the transmission rate of four pospiviroid species through tomato seeds. *Eur J Plant Pathol*. 2015;143(3):613-7.
6. Koenraadt H, Jodlowska A, van Vliet A, Verhoeven K. Detection of TCDVd and PSTVd in seeds of tomato. *Phytopathology*. 2009;99(6):S66-S.
7. Matsushita Y, Tsuda S. Seed transmission of potato spindle tuber viroid, tomato chlorotic dwarf viroid, tomato apical stunt viroid, and *Columnea* latent viroid in horticultural plants. *Eur J Plant Pathol*. 2016;145(4):1007-11.
8. Simmons HE, Rucht TB, Munkvold GP. Frequencies of Seed Infection and Transmission to Seedlings by Potato Spindle Tuber Viroid (A Pospiviroid) in Tomato. *Journal of Plant Pathology and Microbiology*. 2015;6:275.

- 317 9. Botermans M, van de Vossenbergt BT, Verhoeven JT, Roenhorst JW, Hooftman M, Dekter  
318 R, et al. Development and validation of a real-time RT-PCR assay for generic detection of  
319 pospiviroids. *J Virol Methods*. 2013;187(1):43-50.
- 320 10. van Brunschot SL, Bergervoet JH, Pagendam DE, de Weerd M, Geering AD, Drenth A, et  
321 al. Development of a multiplexed bead-based suspension array for the detection and discrimination  
322 of pospiviroid plant pathogens. *PLoS one*. 2014;9(1):e84743.
- 323 11. Monger W, Tomlinson J, Boonham N, Marn MV, Plesko IM, Molinero-Demilly V, et al.  
324 Development and inter-laboratory evaluation of real-time PCR assays for the detection of  
325 pospiviroids. *Journal of Virological Methods*. 2010;169(1):207-10.
- 326 12. Boonham N, Perez LG, Mendez MS, Peralta EL, Blockley A, Walsh K, et al. Development  
327 of a real-time RT-PCR assay for the detection of potato spindle tuber viroid. *J Virol Methods*.  
328 2004;116(2):139-46.
- 329 13. Naktuinbouw. Detection of pospiviroids by real-time RT-PCR on tomato and pepper seeds,  
330 i.e. CEVd, CLVd, PCFVd, TASVd, TCDVd, TPMVd 2017. Available from:  
331 [http://dc.eppo.int/validationlist.php?action=filter&taxonomic=Virus&organism=&validationprocess=  
332 &method=&page=2](http://dc.eppo.int/validationlist.php?action=filter&taxonomic=Virus&organism=&validationprocess=&method=&page=2) [retrieved 1 January 2018]
- 333 14. Naktuinbouw. Real-time RT-PCR (RT TaqMan PCR) for pospiviroids (CEVd, CLVd,  
334 PCFVd, PSTVd, TASVd, TCDVd and TPMVd) on seeds of tomato (*Solanum lycopersicum*) (SPN-  
335 V043e). Reference protocol Naktuinbouw. 2017. Available from:  
336 <https://www.naktuinbouw.nl/node/1184> [retrieved 1 January 2018]
- 337 15. Naktuinbouw. Real-time RT-PCR (RT TaqMan PCR) for pospiviroids (CEVd, CLVd,  
338 PCFVd, PSTVd, TASVd, TCDVd and TPMVd) on seeds of pepper (*Capsicum annum*) (SPN-  
339 V044e). Reference protocol Naktuinbouw. 2017. Available from:  
340 <https://www.naktuinbouw.nl/node/1184> [retrieved 1 January 2018]
- 341 16. ISF. Method for the Detection of Pospiviroids on Tomato Seed. International Seed  
342 Federation 2018. Available from: [https://www.worldseed.org/wp-  
343 content/uploads/2018/02/Pospiviroids\\_tomato\\_Feb2018.pdf](https://www.worldseed.org/wp-content/uploads/2018/02/Pospiviroids_tomato_Feb2018.pdf).



- 344 17. Verhoeven JTJ, Jansen CCC, Willemsen TM, Kox LFF, Owens RA, Roenhorst JW. Natural  
345 infections of tomato by Citrus exocortis viroid, Columnea latent viroid, Potato spindle tuber viroid  
346 and Tomato chlorotic dwarf viroid. Eur J Plant Pathol. 2004;110(8):823-31.
- 347 18. Verhoeven JTJ, Koenraadts HMS, Westenberg M, Roenhorst JW. Characterization of  
348 tomato apical stunt viroid isolated from a 24-year old seed lot of Capsicum annuum. Archives of  
349 Virology. 2017;162(6):1741-4.
- 350 19. Shamloul AM, Hadidi A, Zhu SF, Singh RP, Sagredo B. Sensitive detection of potato  
351 spindle tuber viroid using RT-PCR and identification of a viroid variant naturally infecting pepino  
352 plants. Can J Plant Pathol. 1997;19(1):89-96.
- 353 20. Verhoeven JTJ, Jansen CCC, Roenhorst JW, Flores R, de la Pena M. Pepper chat fruit  
354 viroid: Biological and molecular properties of a proposed new species of the genus Pospiviroid.  
355 Virus Res. 2009;144(1-2):209-14.
- 356 21. Spieker RL. A viroid from Brunfelsia undulata closely related to the Columnea latent viroid.  
357 Arch Virol. 1996;141(10):1823-32.
- 358 22. Van de Vossenberg BT, Van der Straten MJ. Development and validation of real-time PCR  
359 tests for the identification of four Spodoptera species: Spodoptera eridania, Spodoptera frugiperda,  
360 Spodoptera littoralis, and Spodoptera litura (Lepidoptera: Noctuidae). J Econ Entomol.  
361 2014;107(4):1643-54.
- 362 23. Katoh K, Misawa K, Kuma K, Miyata T. MAFFT: a novel method for rapid multiple sequence  
363 alignment based on fast Fourier transform. Nucleic Acids Res. 2002;30(14):3059-66.
- 364 24. Menzel W, Jelkmann W, Maiss E. Detection of four apple viruses by multiplex RT-PCR  
365 assays with coamplification of plant mRNA as internal control. Journal of Virological Methods.  
366 2002;99(1-2):81-92.
- 367 25. EPPO. PM 7/98 (4) Specific requirements for laboratories preparing accreditation for a plant  
368 pest diagnostic activity. EPPO Bulletin. 2019;49(3):530-63.
- 369 26. Monger W, Tomlinson J, Boonham N, Marn MV, Plesko IM, Molinero-Demilly V, et al.  
370 Development and inter-laboratory evaluation of real-time PCR assays for the detection of  
371 pospiviroids. J Virol Methods. 2010;169(1):207-10.

- 372 27. Owens RA, Flores R, Di Serio F, Li S-F, Pallas V, Randles JW, et al. Viroids. In: King AMQ,  
373 Adams MJ, Carstens EB, Lefkowitz EJ, editors. Virus Taxonomy, Classification, Nomenclature of  
374 Viruses, Ninth Report of the International Committee on Taxonomy of Viruses. Waltham, MA, USA:  
375 Elsevier Academic Press; 2012. p. 1221-34.
- 376 28. Olivier T, Sveikauskas V, Demonty E, De Jonghe K, Gentil P, Virscek-Marn M, et al. Inter-  
377 laboratory comparison of four RT-PCR based methods for the generic detection of pospiviroids in  
378 tomato leaves and seeds. *Eur J Plant Pathol.* 2016;144(3):645-54.
- 379 29. Mehle N, Kogovsek P, Racki N, Jakomin T, Gutierrez-Aguirre I, Kramberger P, et al. Filling  
380 the gaps in diagnostics of Pepino mosaic virus and Potato spindle tuber viroid in water and tomato  
381 seeds and leaves. *Plant Pathol.* 2017;66(7):1191-201.  
382
